# Supplementary material for: Amino-functionalization enhanced CO2 reduction reaction in pure water
Source: Royal Society of Chemistry journal article supplement (doi:10.1039/d4nr01416b), 2024-01-01
Supplement: d4nr01416b1.pdf [file d4nr01416b1.pdf]

1 Supporting Information for

2 **Amino-Functionalization Enhanced CO<sub>2</sub> Reduction Reaction in Pure Water**

3

4 Junfeng Chen,<sup>[a]</sup> Wenzhe Niu,<sup>[a]</sup> Liangyao Xue,<sup>[a]</sup> Kai Sun,<sup>[a]</sup> Xiao Yang,<sup>[a]</sup> Xinyue

5 Zhang,<sup>[a]</sup> Weihang Li,<sup>[a]</sup> Shuanglong Huang,<sup>[a]</sup> Wenjuan Shi,<sup>\*[a]</sup> Bo Zhang,<sup>\*[a]</sup>

6

7 <sup>[a]</sup>State Key Laboratory of Molecular Engineering of Polymers, Department of

8 Macromolecular Science, Fudan University, Shanghai 200438, China.

9

10 \*Corresponding author:

11

## 12 **Methods**

### 13 **Materials**

14 The ultrapure water ( $18.2 \text{ M}\Omega \cdot \text{cm}^{-1}$ ) used in all experiments was prepared by passing  
15 through an ultra-pure purification system. Silver nitrate ( $\geq 99.8\%$ ), methanol ( $\geq 99.5\%$ ),  
16 ethanol ( $\geq 99.7\%$ ), isopropanol ( $\geq 99.7\%$ ), potassium bicarbonate ( $\geq 99.5\%$ ), potassium  
17 hydroxide ( $\geq 85.0\%$ ), melamine ( $\geq 99.0\%$ ), dimethylformamide ( $\geq 99.5\%$ ), acetone  
18 ( $\geq 99.0\%$ ), ammonia water (25~28%), hydrochloric acid (36.0~38.0%), sodium  
19 nitrite ( $\geq 99.5\%$ ) were purchased from Sinopharm Chemical Reagent Company.  
20 Amorphous carbon powders (Vulcan XC72) were purchased from Suzhou Sinero  
21 Technology company. The Nafion solution (Dupont, D-520 dispersion, 5 wt% in  
22 water and 1-propanol) was purchased from Alfa Aesar. Sigracet 39BC GDL, the  
23 Sustainion solution (XA-9) and an anion exchange membrane (Sustainion X37-50  
24 Grade RT) were purchased from Fuel Cell Store. All chemicals, including precursors,  
25 solvents, hydrophobic agents and ionomers, unless otherwise stated, were used  
26 without further purification.

27

### 28 **Preparation of the amino-modified carbon powder:**

29 Melamine (504 mg) was dissolved in 200 mL of deionized water. This solution was  
30 then added to carbon Vulcan XC72 (500 mg) and the mixture was stirred until an  
31 emulsion was formed. Then, sodium nitrite (287 mg) was added followed by the  
32 addition of concentrated HCl (5 ml). The mixture was stirred for 12 h and thereafter  
33 filtered over a nylon membrane having a pore size of  $0.45 \mu\text{m}$ . The powder was then  
34 washed with successive aliquots of water, DMF, methanol and acetone. Finally, the  
35 amino-modified carbon powder was dried in a vacuum oven at  $60 \text{ }^\circ\text{C}$  for 6 hours,  
36 yielding a high-purity product. When preparing carbon powder with different amino-  
37 modified content, the quantities of melamine, water, sodium nitrite and hydrochloric  
38 acid are increased proportionally. The preparation of the amino-modified carbon  
39 powder had been optimized.

40

### 41 **Preparation of silver-based catalyst:**

42 Silver nitrate (170 mg) was dissolved in water (10 mL), followed by the slow addition  
43 of concentrated ammonia water (250  $\mu\text{L}$ ), with vigorous shaking to obtain a clear  
44 silver-ammonia solution. Carbon powder (200 mg) was then dispersed in a mixed  
45 solution of water (50 mL) and ethanol (50 mL), to which the silver-ammonia solution  
46 (3 mL) was added. Subsequently, concentrated ammonia water (1.2 mL) was added  
47 slowly. The mixture was placed in a water bath at  $50 \text{ }^\circ\text{C}$  for 14 h and thereafter  
48 filtered over a nylon membrane having a pore size of  $0.45 \mu\text{m}$ . The powder was then  
49 washed with successive aliquots of water and ethanol, each thrice. Finally, the silver-  
50 based catalyst was dried in a vacuum oven at  $60 \text{ }^\circ\text{C}$  for 6 hours, yielding a high-purity  
51 product. The Ag nanoparticle 's deposition had been optimized.

52

### 53 **Preparation of gas diffusion electrodes (GDEs).**

54 In the fabrication of Gas Diffusion Electrodes (GDE), a catalyst ink was prepared by

55 homogeneously mixing 12 mg of catalysts with methanol (2.7 mL), water (0.3 mL)  
56 and Nafion solution (60  $\mu\text{L}$ ), followed by sonication to ensure uniform dispersion.  
57 This slurry was then carefully applied onto a 2 cm  $\times$  2 cm Gas Diffusion Layer (GDL)  
58 using a drip-coating technique. Subsequently, a mixture of Sustainion (100  $\mu\text{L}$ )  
59 solution and ethanol (1 mL) was sprayed onto the GDE. The conversion to hydroxide  
60 form is then achieved by treatment with a 1 M KOH solution.

61

### 62 **Structural characterization.**

63 Scanning Electron Microscopy (SEM) analysis was conducted on a Hitachi FE-SEM  
64 S-4800, operated at an accelerating voltage of 1.0 kV, providing detailed surface  
65 morphology insights. High-Resolution Transmission Electron Microscopy (HRTEM)  
66 images were captured using a JEOL JEM-2100F transmission electron microscope,  
67 functioning at 200 kV. Scanning Transmission Electron Microscopy (STEM)  
68 investigations were performed on two sophisticated instruments: an FEI Titan Cubed  
69 60-300, operating at a high accelerating voltage of 300 kV and a JEOL ARM-200F  
70 equipped with a cold field emission gun and a CEOS-corrected Cs probe, at an  
71 operating voltage of 200 kV. X-ray Photoelectron Spectroscopy (XPS) was carried  
72 out on a PHI 5700 ESCA System, employing Al K $\alpha$  X-ray radiation (1486.6 eV) for  
73 excitation. Powder X-ray Diffraction (XRD) patterns were acquired using a  
74 MiniFlex600 instrument, operating in Bragg-Brentano mode. The instrument was  
75 configured with a 0.02  $^\circ$  divergence and a scan rate of 0.1  $^\circ\text{s}^{-1}$ . The adsorption-  
76 desorption isotherms of CO<sub>2</sub> were obtained using Micromeritics ASAP 2460 at  
77 conditions of 298 K and 1 atm. The Fourier Transform Infrared Spectrometer (FTIR)  
78 measurements were conducted using a Bruker INVENIO S, employing the KBr pellet  
79 method for sample preparation. Zeta potential measurements were conducted with a  
80 Malvern Instruments ZS90 apparatus, the test samples were catalyst suspensions at a  
81 concentration of 0.05 mg $\cdot\text{mL}^{-1}$ , dispersed in ultrapure water (18.2 M $\Omega\cdot\text{cm}^{-1}$ ). If not  
82 specified, the sample tested before the electrochemical activity is a powder sample.  
83 The samples tested after the reaction are electrodes.

84

### 85 **Temperature programmed desorption (TPD).**

86 For the CO<sub>2</sub> adsorption studies, a sophisticated TPD apparatus equipped with a  
87 thermal conductive detector (AutoChem II 2920) was employed. The catalysts  
88 underwent a degassing process at 100 $^\circ\text{C}$  under a continuous flow of Helium (He) gas,  
89 effectively removing any pre-adsorbed gases from the catalyst surface. This process  
90 lasted for 1 hour, ensuring thorough preparation of the catalysts for subsequent CO<sub>2</sub>  
91 adsorption. Following degassing, CO<sub>2</sub> gas was introduced to the system, allowing for  
92 ample adsorption onto the catalysts. Excess CO<sub>2</sub> was then purged using Helium. The  
93 TPD sequence was initiated under a steady He flow at a constant velocity, facilitating  
94 the transport of desorbed CO<sub>2</sub> molecules to the detector. This methodology provided a  
95 detailed understanding of CO<sub>2</sub> adsorption and desorption dynamics on the catalyst  
96 surfaces, crucial for elucidating their catalytic behavior and efficiency in  
97 electrochemical processes.

98

99 **Operando attenuated total reflection surface-enhanced infrared absorption**  
100 **spectroscopy (ATR-SEIRAS):**

101 Firstly, the Au film was deposited on the reflecting plane of the Si prism according to  
102 the ‘two-step wet process’. Different Ag-based catalysts coated on the Au/Si substrate  
103 were used as the working electrode. A Hg/HgO electrode and a graphite rod were  
104 applied as the reference and counter electrodes, respectively. The electrolyte was 0.5  
105 M KHCO<sub>3</sub> with CO<sub>2</sub> during the experiment. The electrode potential was altered from  
106 -0.41 V to -1.91 V versus the reversible hydrogen electrode (RHE) in a stepwise  
107 manner. Concurrently, the infrared spectra were recorded with a time resolution of 30  
108 s per spectrum at a spectral resolution of 4 cm<sup>-1</sup>.

109 The electrode potentials were rescaled to the RHE reference using the following  
110 equation:

$$111 E_{(vs. RHE)} = E_{(vs. Hg/HgO)} + 0.098 V + 0.0591 pH$$

112

113 **Electrochemical measurements.**

114 The zero-gap CO<sub>2</sub> electrolyzer was assembled from two specially customized titanium  
115 plates, incorporating a reaction area of 1 cm<sup>2</sup>. The anode electrode was composed of  
116 IrO<sub>2</sub>/Ti, with the catalyst uniformly sprayed onto treated titanium felt at a density of 3  
117 mg·cm<sup>-2</sup>. An anionic ion-exchange membrane, Sustainion X37-50 Grade RT was used,  
118 after pre-soaking in 1M KOH for 48 h. During assembly, polytetrafluoroethylene  
119 (PTFE) spacers of specific thickness were used to separate the two electrode plates,  
120 arranged in the order of cathode plate-cathode electrode-ion exchange membrane-  
121 anode electrode-anode plate for tight assembly. In the testing process: on the anode  
122 side, a peristaltic pump was used to uniformly introduce ultrapure water at a constant  
123 temperature of 50 °C. On the cathode side, an Alicat Scientific mass flow controller  
124 was employed to maintain a CO<sub>2</sub> flow rate of 20 sccm, with the product gases directed  
125 into a gas chromatograph for analysis. The actual flow rate within the system was  
126 accurately determined using a bubble flowmeter located at the outlet of the cathodic  
127 chamber. This comprehensive setup ensured precise control over the experimental  
128 conditions, vital for the reliable assessment of CO<sub>2</sub>RR catalytic performance. A  
129 Kikusui constant current source provided the electrical energy and recorded the full  
130 cell voltage and current during the reaction process.

131

132 **Electrochemical impedance spectroscopy(EIS)**

133 The EIS of various catalysts was measured in a homemade flow-cell configuration  
134 consisting of a gas chamber, a cathodic chamber, and an anodic chamber. The as-  
135 prepared working electrode was fixed between the gas and cathodic chambers, with  
136 the catalyst layer side facing the cathodic chamber (geometric active surface area of 1  
137 cm<sup>2</sup>). The Ni foam electrode and the Hg/HgO electrode (with 1 M KOH as the filling  
138 solution) were employed as counter and reference electrodes. The AEM was used to  
139 separate the cathode and the anode chambers.

140 The electrode potentials were rescaled to the RHE reference by the following equation:

$$141 E_{(vs. RHE)} = E_{(vs. Hg/HgO)} + 0.098 V + 0.0591 pH$$

142 The combined catalyst and diffusion layer, AEM and nickel anode were then

143 positioned and clamped together using polytetrafluoroethylene (PTFE) spacers such  
144 that 0.5 M KHCO<sub>3</sub> electrolytes could be introduced into the chambers between the  
145 anode and membrane, as well as the membrane and the cathode, at 10 mL·min<sup>-1</sup> using  
146 a peristaltic pump. The supplied CO<sub>2</sub> (Air France, 99.9%) flow was kept constant at  
147 20 mL·min<sup>-1</sup> using an Alicat Scientific mass flow controller. The actual flow rate was  
148 determined using a bubble flowmeter at the outlet of the cathodic chamber.

149

#### 150 **Product analysis**

151 The gas products (CO, H<sub>2</sub>) were analyzed online continuously using a gas  
152 chromatograph (Ruimin Technologies, GC2060). The gas chromatograph was  
153 equipped with a packed TDX-01 column, a packed 5A column and Porapak T column.  
154 Argon (Shanghai TOMOE gases, 99.999%) was used as the carrier gas. Gas  
155 chromatography was calibrated using certified standard gases in advance and the FE  
156 of the products was calculated as follows:

$$157 \quad FE = \frac{\varphi VPnF}{j RT} \times 100\%$$

158 where  $\varphi$  is the volume fraction of CO or H<sub>2</sub>, V represents the CO<sub>2</sub> gas flow rate, and  $j$   
159 is the total current from the potentiostat.  $P$ ,  $n$ ,  $F$ ,  $R$  and  $T$  are pressure, number of  
160 electrons transferred, Faraday's constant, ideal gas constant and temperature,  
161 respectively.

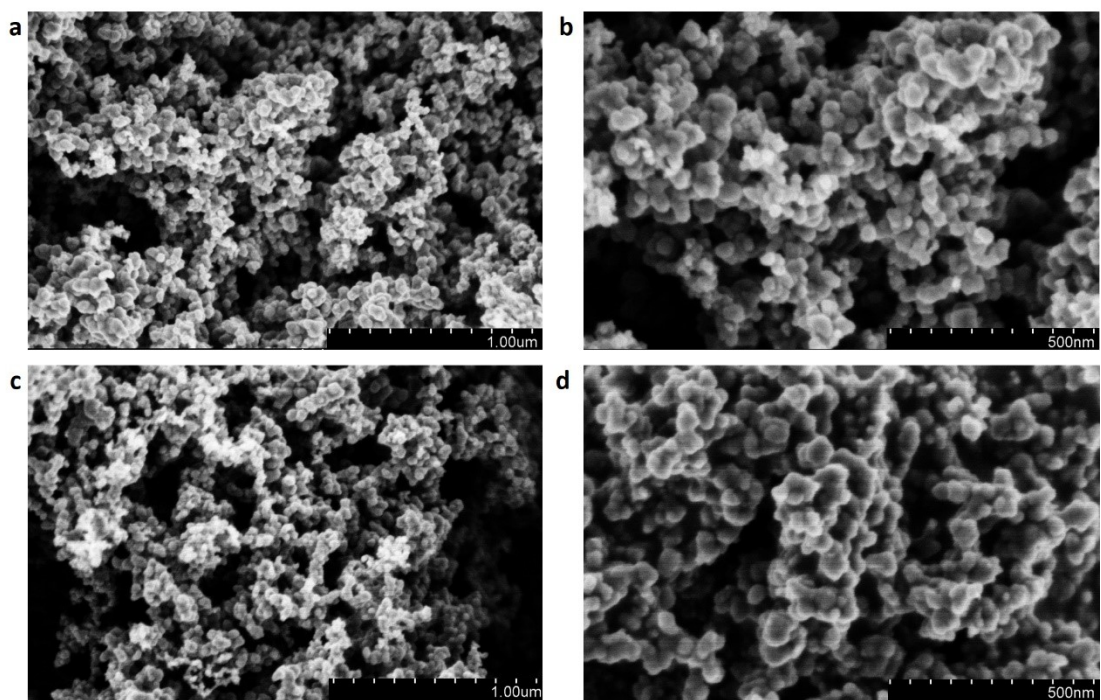

162

163 **Figure S1.** SEM images of the different samples. SEM images of (a-b) the Ag-C, (c-  
164 d) the Ag-C-Mel. Scale bar, 1  $\mu\text{m}$  and 500 nm, respectively.

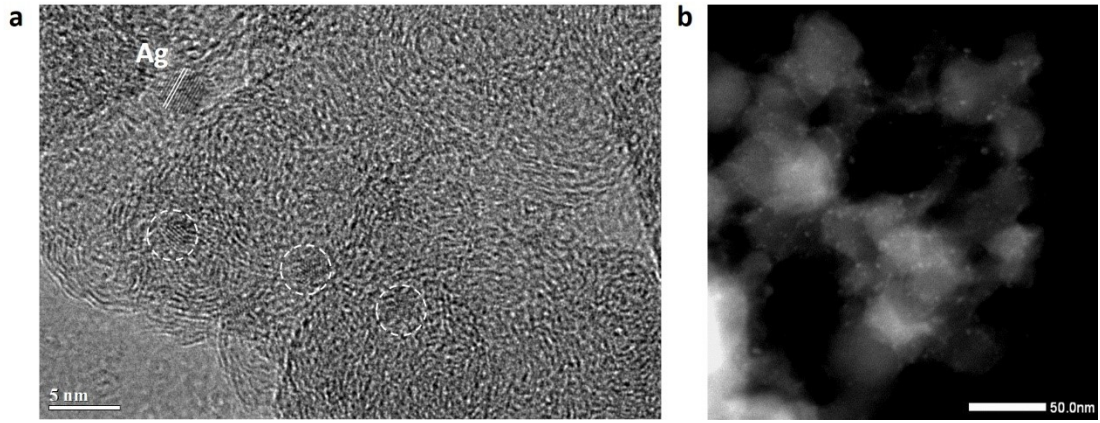

165

166 **Figure S2.** TEM images of the Ag-C samples. (a) HRTEM images of the Ag-C  
167 samples. Scale bar, 5 nm. (b) STEM images of the Ag-C. Scale bar, 50 nm.

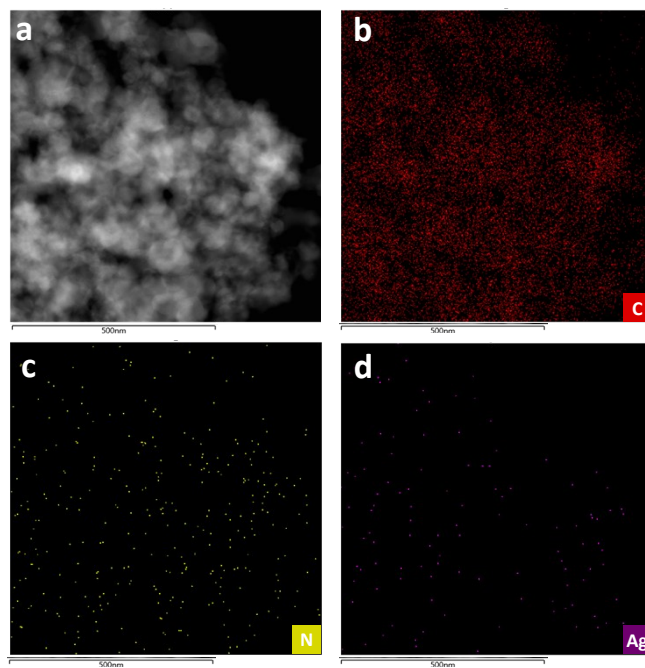

168  
169 **Figure S3.** Energy-dispersive X-ray spectroscopy (EDS) elemental mapping images  
170 of Ag-C-Mel.



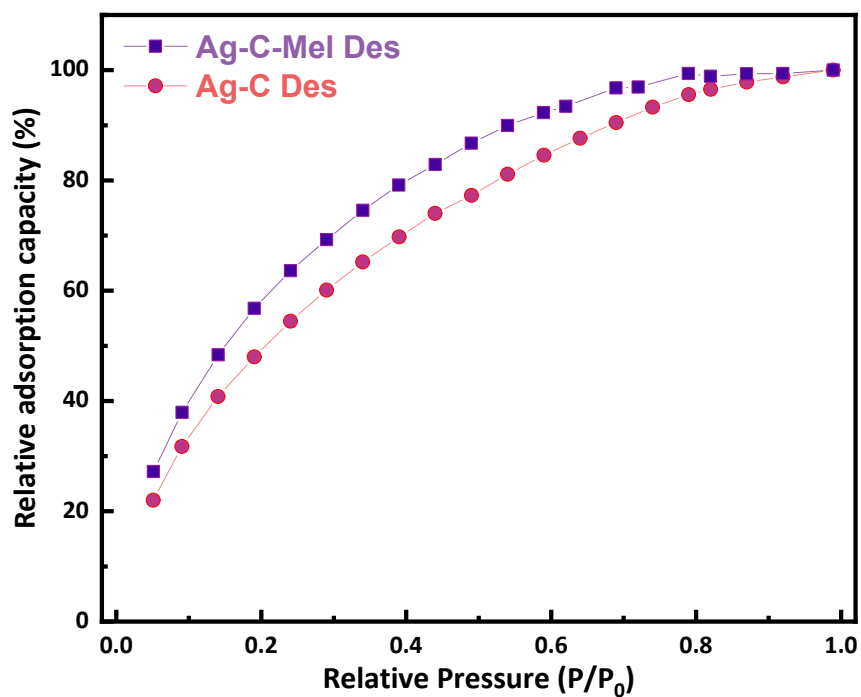

171

172 **Figure S4.** The CO<sub>2</sub> adsorption capacity of different catalysts relative to their  
173 maximum adsorption capacity during the CO<sub>2</sub> desorption process.

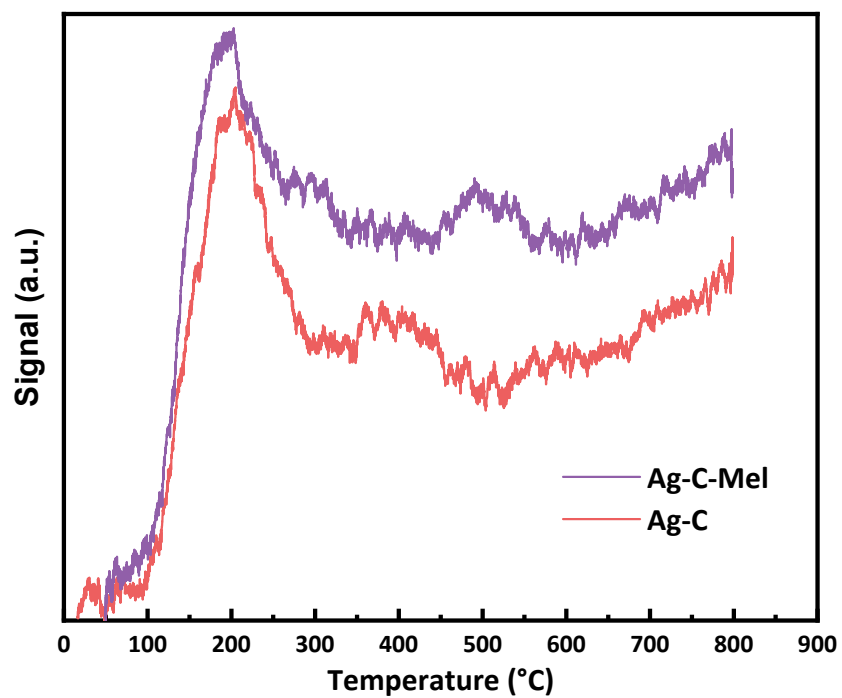

174

175 **Figure S5.** CO<sub>2</sub>-TPD of the Ag-C-Mel and the Ag-C catalysts.

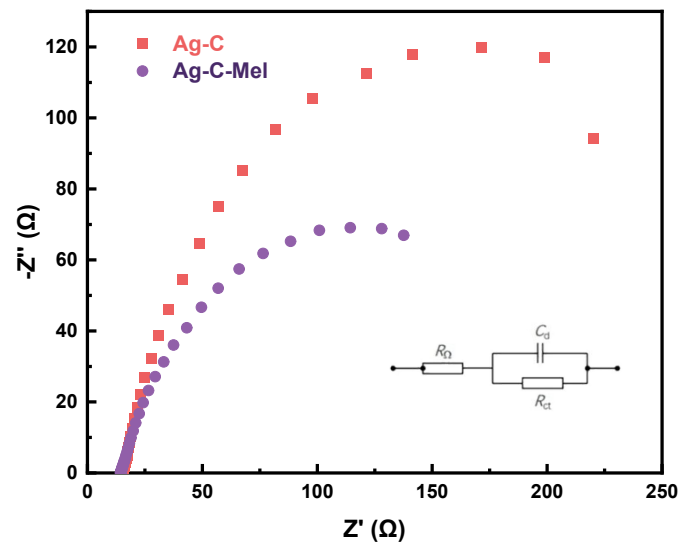

176

177 **Figure S6.** EIS Nyquist plots and equivalent circuit (inset) at  $-0.5$  V vs. RHE.

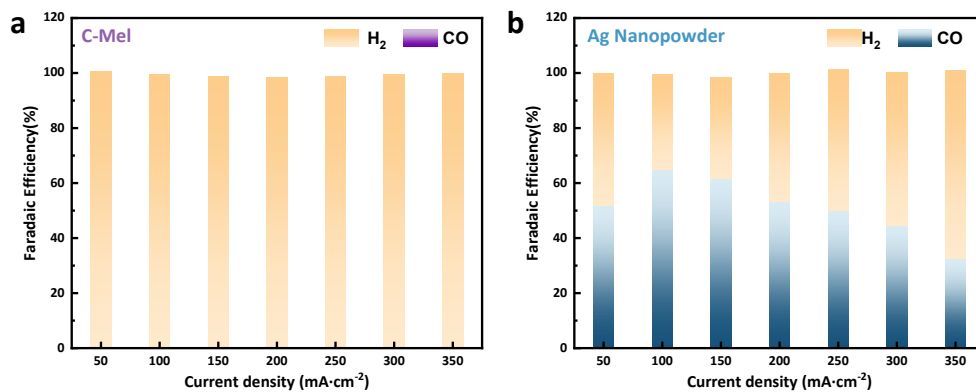

178

179 **Figure S7.** The CO<sub>2</sub>RR performance of the C-Mel and the Ag nanopowder in zero-  
 180 gap CO<sub>2</sub> electrolyzer utilizing pure water. (a, b) CO<sub>2</sub>RR products distribution under  
 181 different current densities for (a) the C-Mel and (b) the Ag nanopowder.

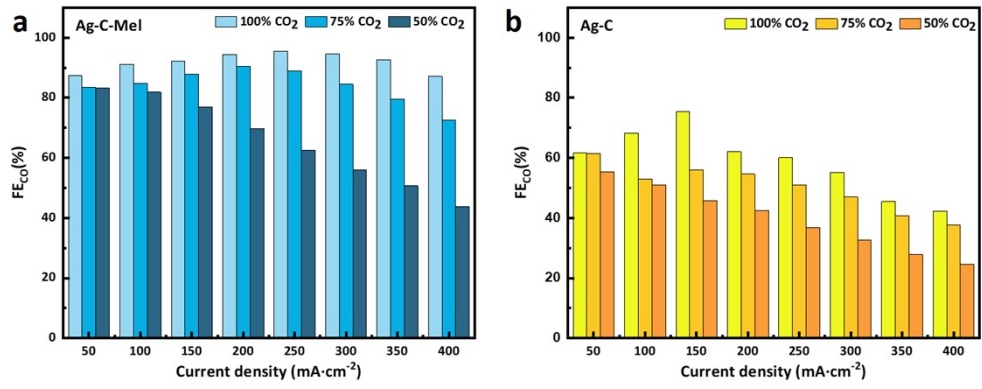

182

183 **Figure S8.** The FE<sub>CO</sub> of (a) the Ag-C-Mel and (b) the Ag-C catalysts at different CO<sub>2</sub>  
 184 partial pressures.

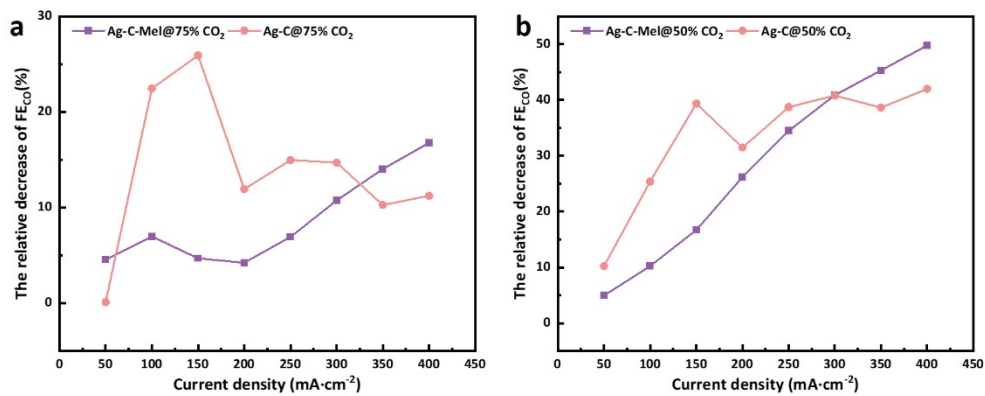

185

186 **Figure S9.** The relative decrease of  $FE_{CO}$  of the Ag-C-Mel and the Ag-C catalysts  
 187 under different  $CO_2$  partial pressure compared with  $FE_{CO}$  under 100%  $CO_2$  partial  
 188 pressure, (a) 75%  $CO_2$  partial pressure, (b) 50%  $CO_2$  partial pressure.

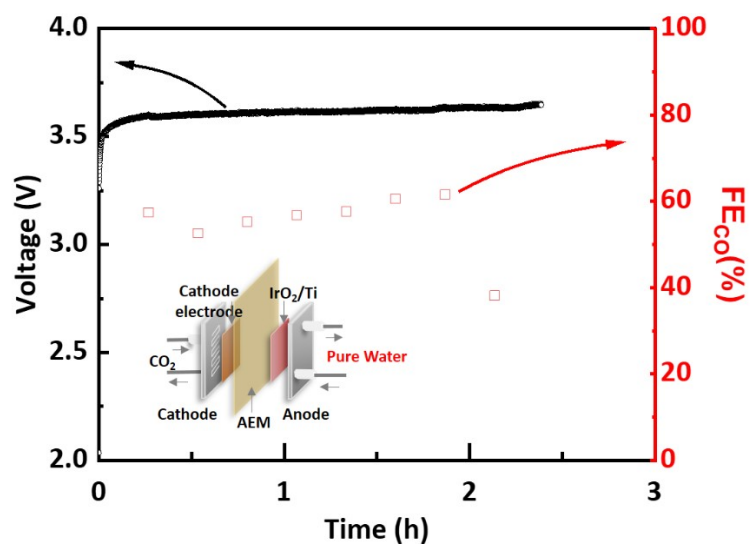

189

190 **Figure S10.** Continuous measurement of the Ag-C at the current density of 250  
 191 mA·cm<sup>-2</sup>.

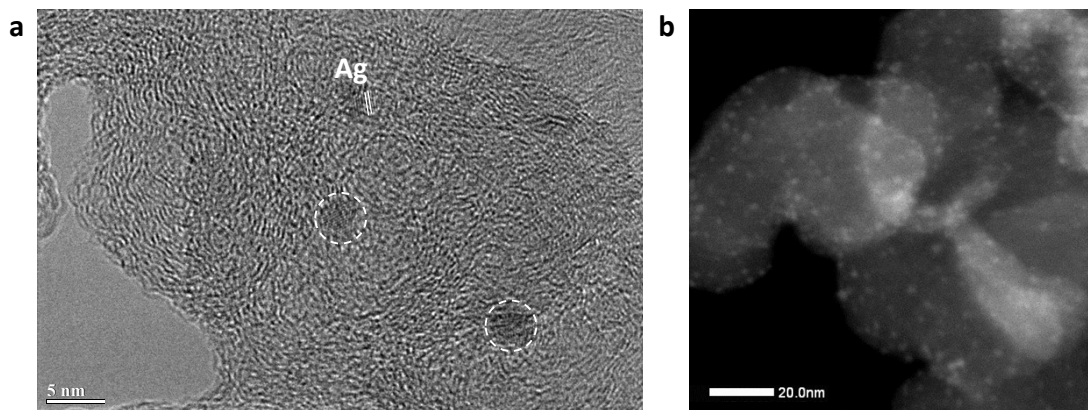

192  
193 **Figure S11.** TEM images of the Ag-C-Mel samples after electrochemical activity. (a)  
194 HRTEM images of the Ag-C-Mel samples after electrochemical activity. Scale bar, 5  
195 nm. (b) STEM images of the Ag-C-Mel samples after electrochemical activity. Scale  
196 bar, 50 nm.



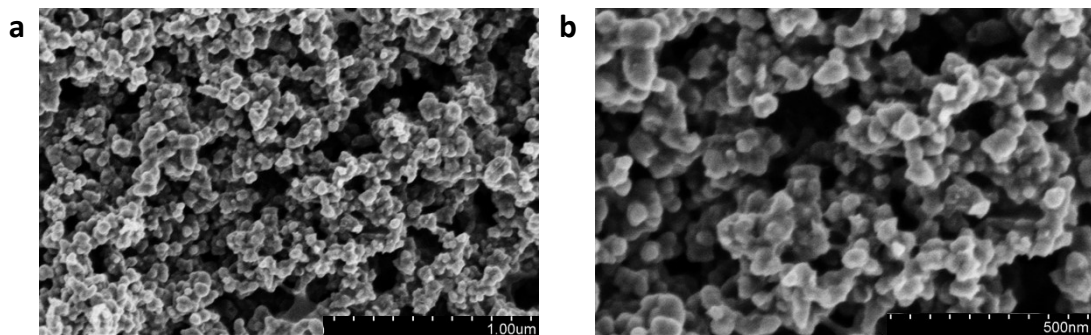

197

198 **Figure S12.** SEM images of the Ag-C-Mel after electrochemical activity. Scale bar, 1

199 μm and 500 nm, respectively.

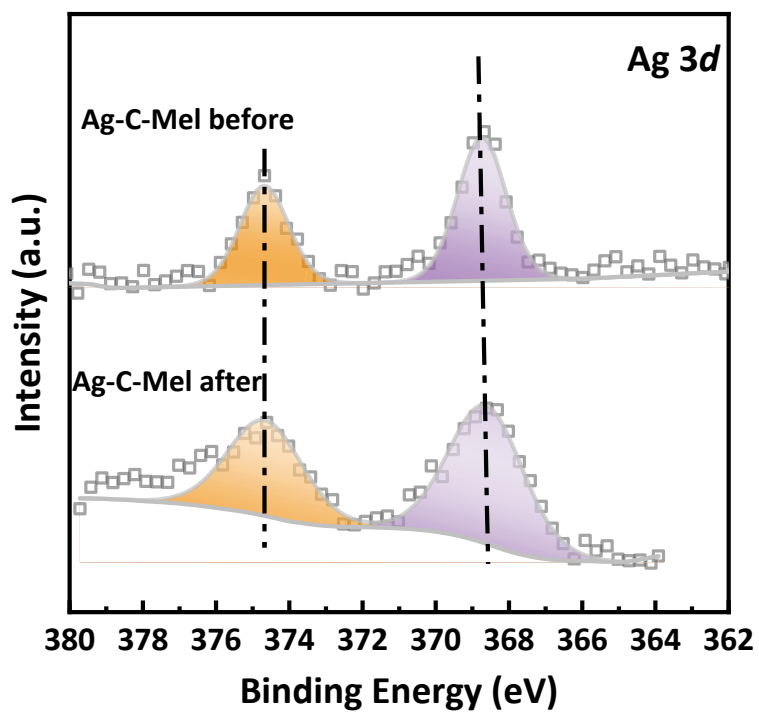

200

201 **Figure S13.** Ag 3d spectra of the Ag-C-Mel before and after electrochemical activity.

202

**Table S1 ICP results of different samples.**

| Sample   | Element | Mass content(%) |
|----------|---------|-----------------|
| Ag-C     | Ag      | 3.286           |
| Ag-C-Mel | Ag      | 2.256           |

203
